# Supplementary material for: NMR spin–spin coupling constants: bond angle dependence of the sign and magnitude of the vicinal3JHFcoupling
Source: Royal Society of Chemistry journal article supplement (doi:10.1039/c6cp04853f), 2016-01-01

ELECTRONIC SUPPLEMENTARY INFORMATION (ESI):

**NMR Spin-Spin Coupling Constants: Bond angle dependence of the sign and magnitude of the vicinal  $^3J_{\text{HF}}$  coupling**

Renan V. Viesser,<sup>a</sup> Lucas C. Ducati,<sup>b\*</sup> Jochen Autschbach<sup>c\*</sup> and Cláudio F. Tormena<sup>a</sup>

<sup>a)</sup> Institute of Chemistry, University of Campinas – UNICAMP, P. O. Box 6154, 13083-970 Campinas, SP, Brazil.

<sup>b)</sup> Department of Fundamental Chemistry, Institute of Chemistry, University of São Paulo, Av. Prof. Lineu Prestes, 748, 05508-000, São Paulo, SP, Brazil. E-mail: ducati@iq.usp.br

<sup>c)</sup> Department of Chemistry, University at Buffalo, State University of New York, Buffalo, New York 14260-3000, USA. E-mail: jochena@buffalo.edu

**Figure S1.** SSCC (Hz) in terms of NBO decomposition for compound **3**, in parentheses  $-E^{(2)}$  (kcal mol<sup>-1</sup>) delocalization associated with off-diagonal SSCC contribution.

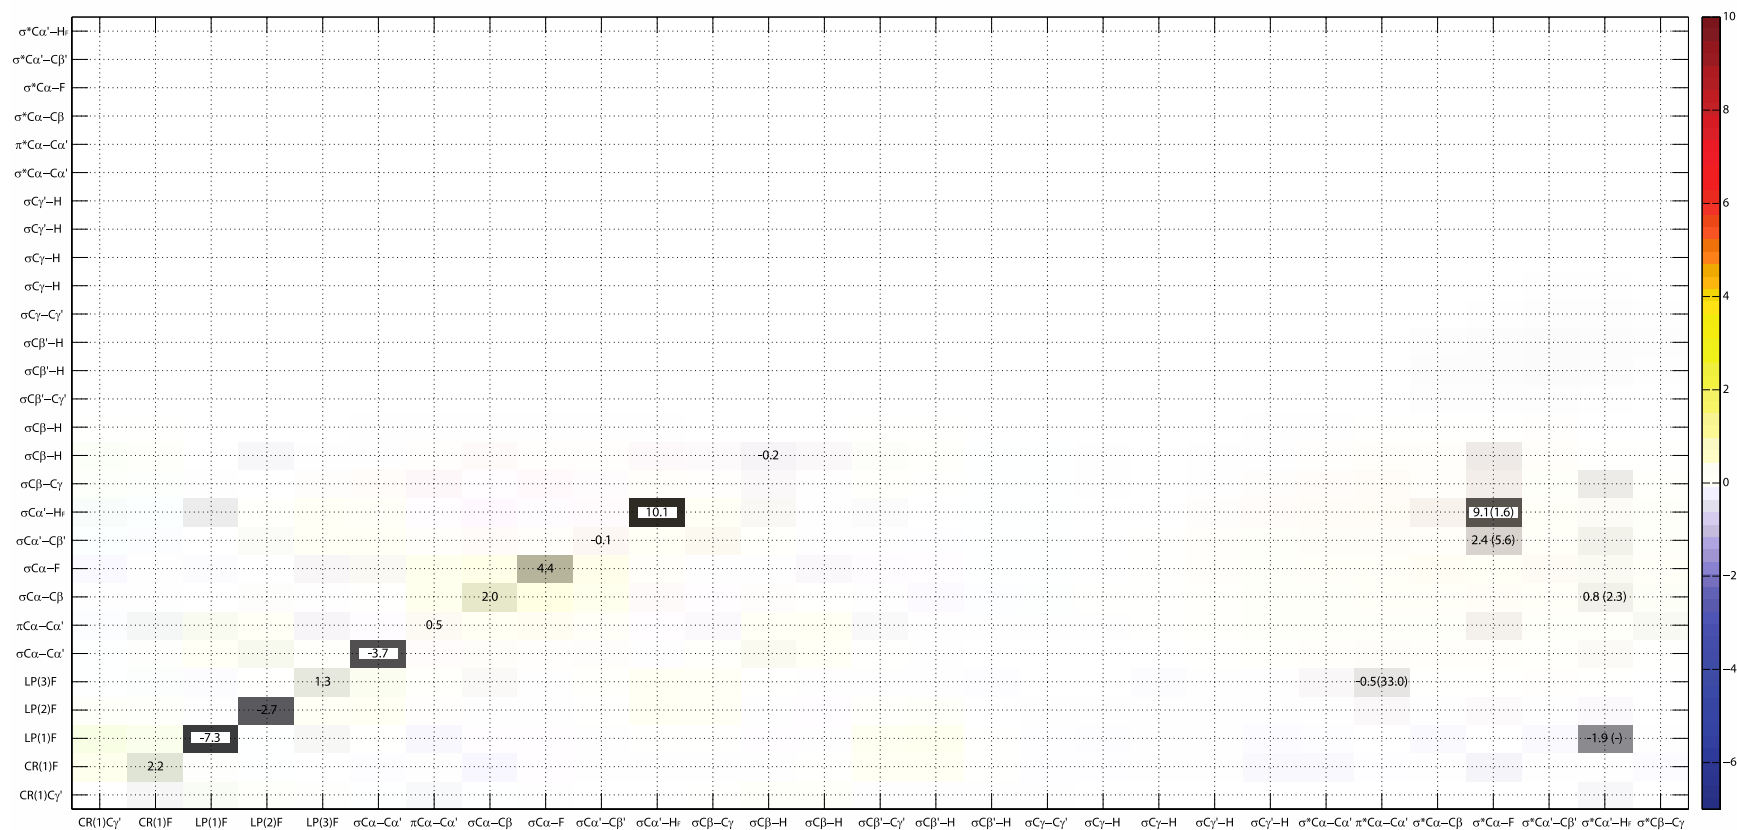

**Figure S2.** SSCC (Hz) in terms of NBO decomposition for compound **4**, in parentheses  $-E^{(2)}$  (kcal mol<sup>-1</sup>) delocalization associated with off-diagonal SSCC contribution.

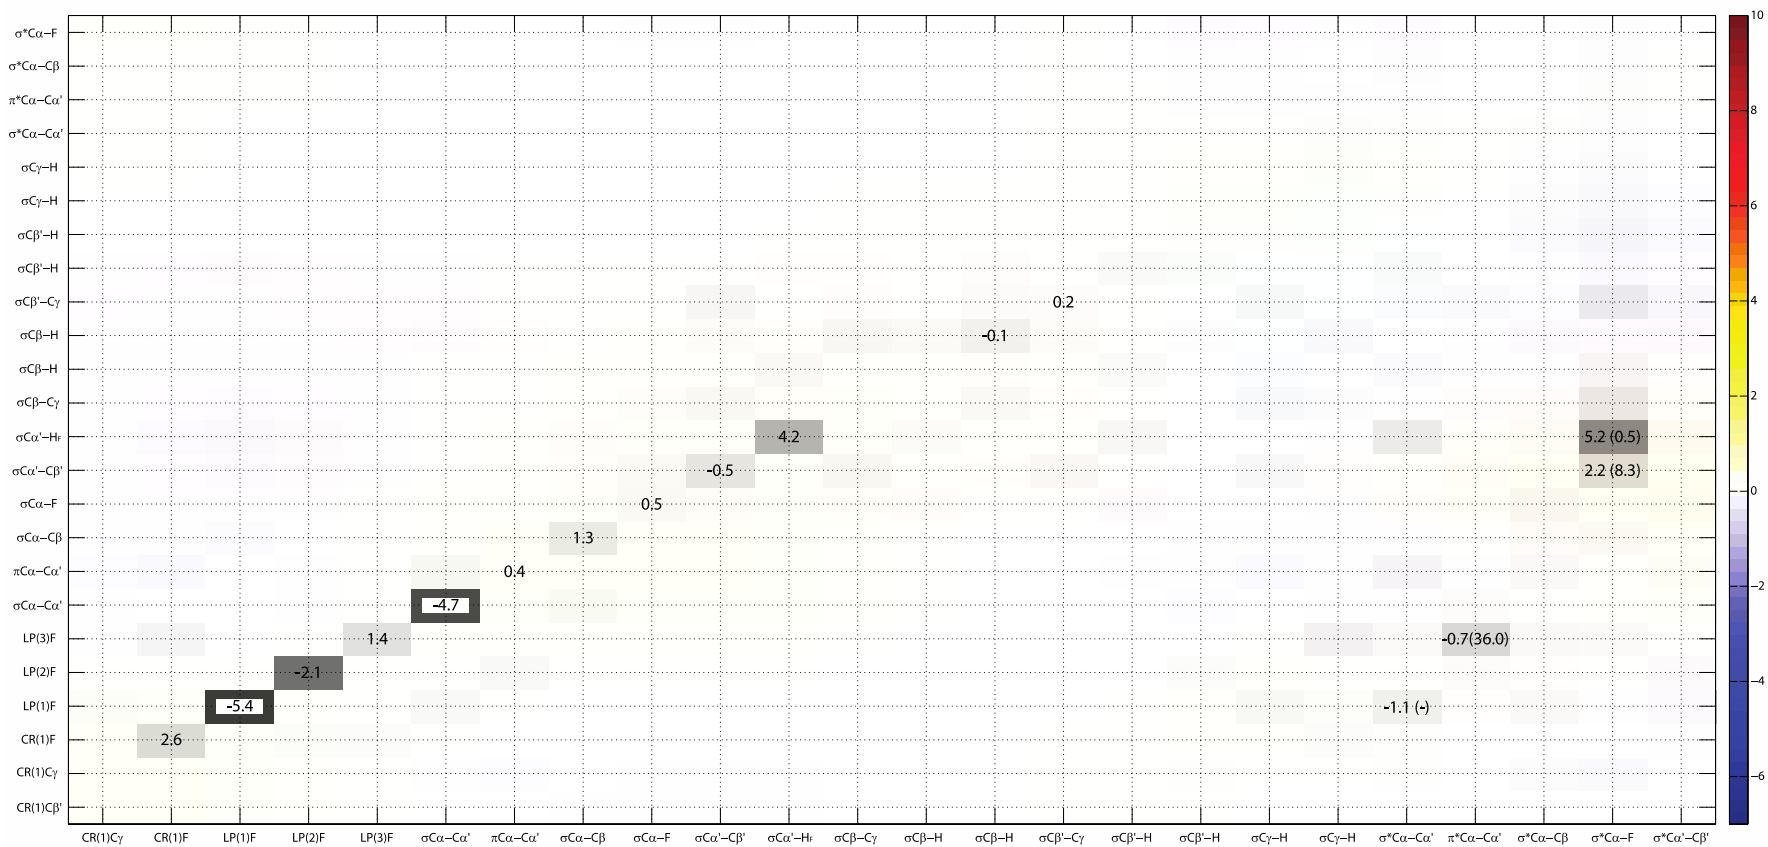

**Figure S3.** SSCC (Hz) in terms of NBO decomposition for compound **5**, in parentheses  $-E^{(2)}$  (kcal mol<sup>-1</sup>) delocalization associated with off-diagonal SSCC contribution.

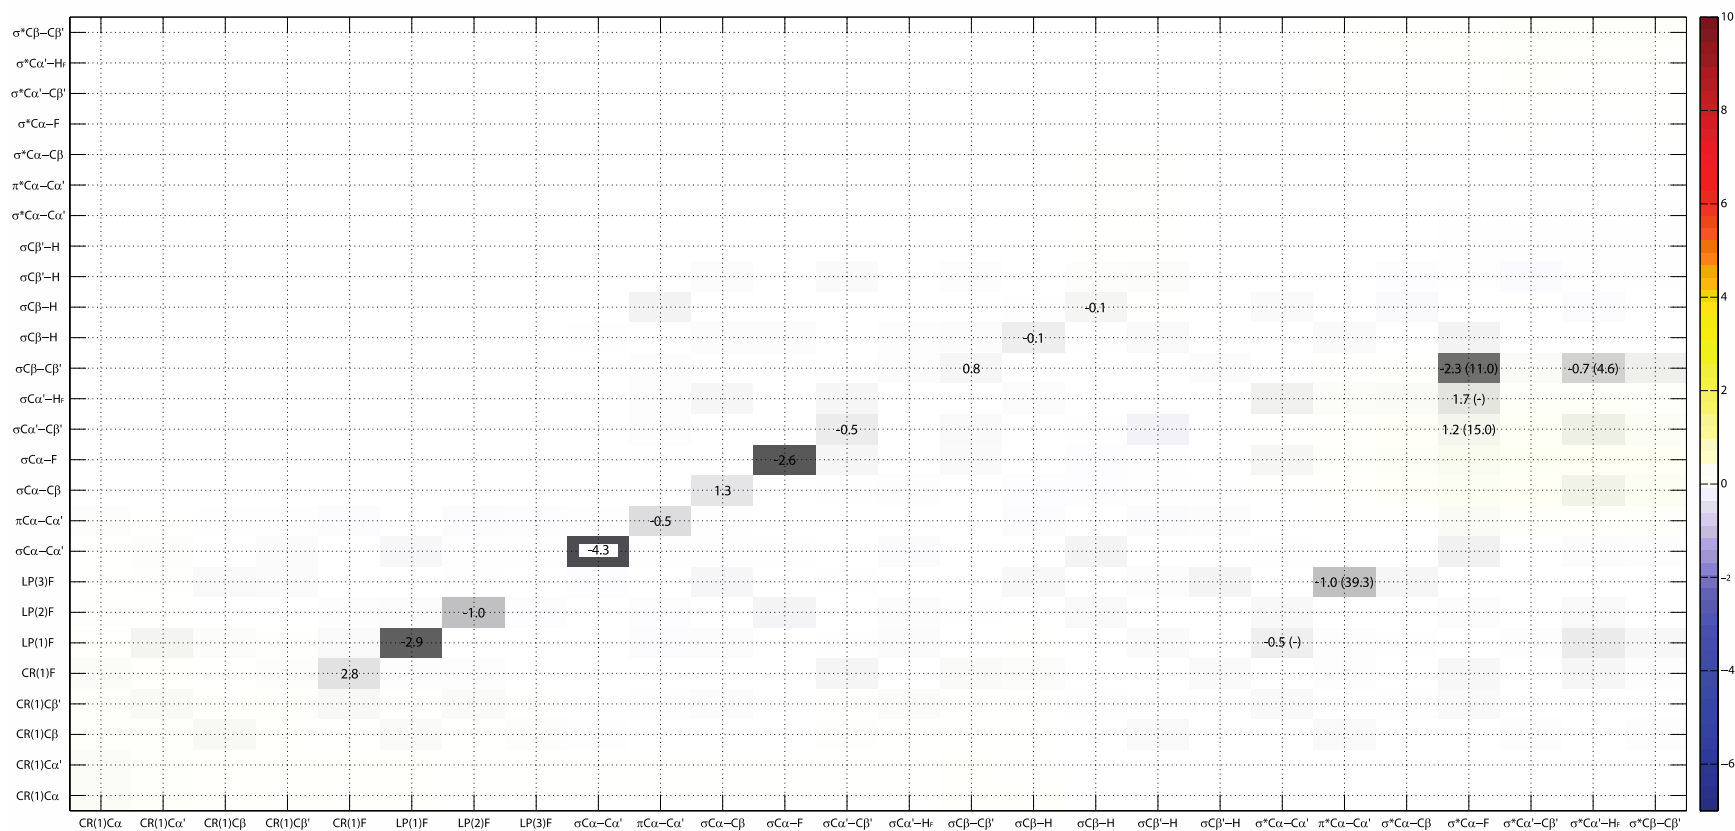



**Figure S5.** Main  ${}^3J_{\text{H}_\text{F}\text{F}}$  through-space ( ${}^{\text{TS}}J_{\text{H}_\text{F}\text{F}}$ ) and through-bond ( ${}^{\text{TB}}J_{\text{H}_\text{F}\text{F}}$ ) transmission mechanisms for compounds 3-6.

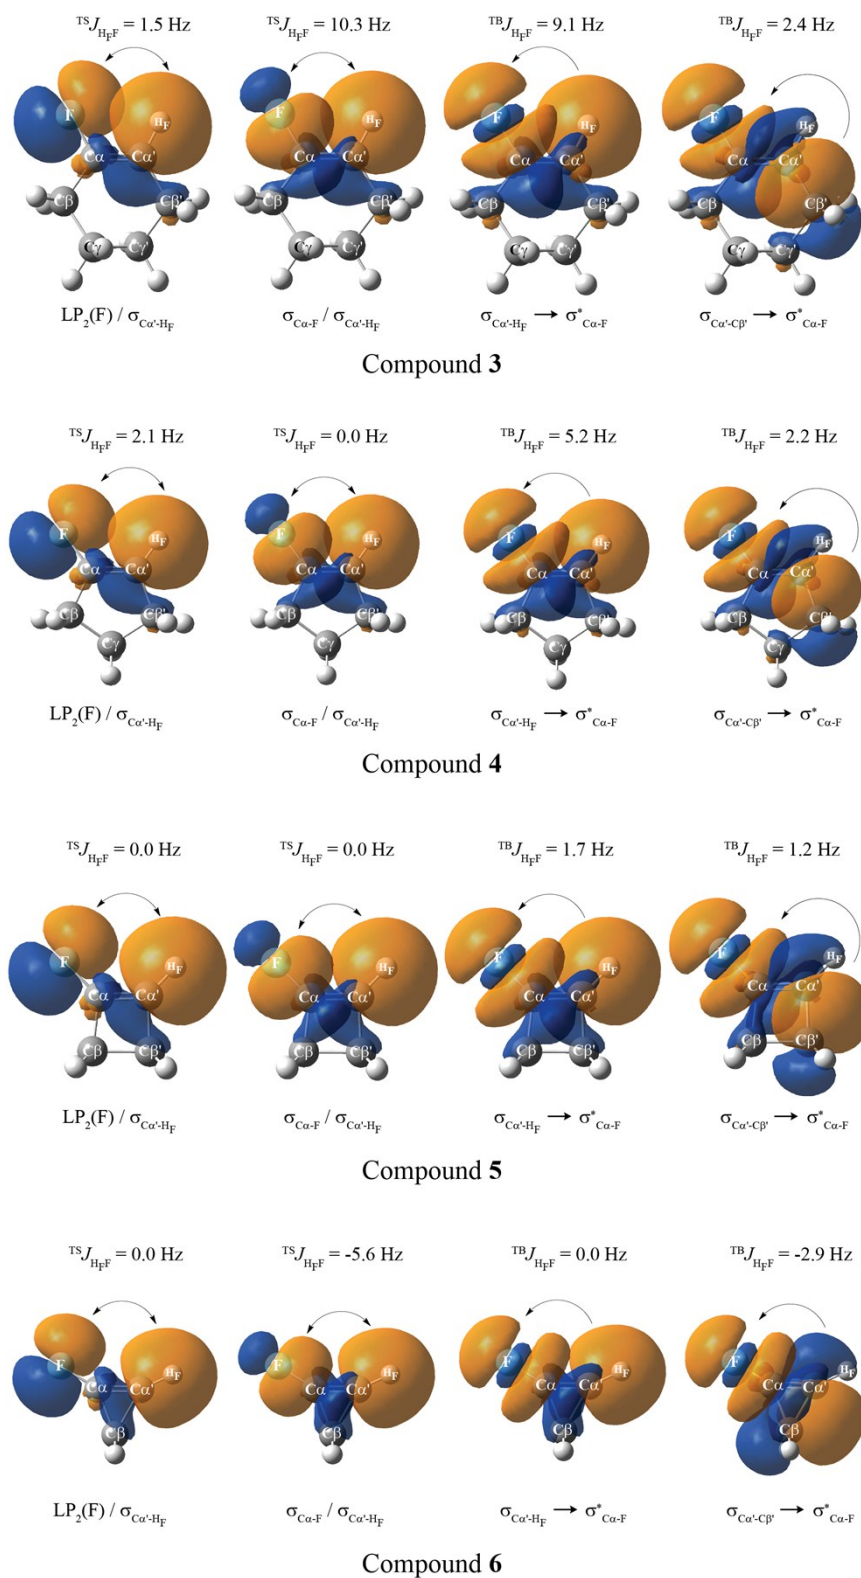

**Table S1.** Experimental ( $J_{\text{exp}}$ )<sup>a</sup> and theoretical  ${}^3J_{\text{H}_\text{F}}(\text{total } J)$ <sup>a</sup> coupling constants at the PBE0 and SOPPA(CCSD) levels of theory using TZ2P and aug-cc-pTVZ-J basis sets for fluoro-ethylene series from 20° to 120° angle between the  $\sigma_{\text{C}\alpha\text{-F}}$  and  $\sigma_{\text{C}\alpha'\text{-H}_\text{F}}$  vectors ( $\theta$ ). Distances  $r_{\text{F-H}_\text{F}}$ ,  $r_{\text{C-H}_\text{F}}$ , and  $r_{\text{C-F}}$  (Angstrom) and bond angles were calculated at the MP2/aug-cc-pVTZ level.

| $\theta$                         | 20                 |      | 40    |      | 60    |      | Equilibrium (63.2) |      | 80    |      | 100   |      | 120   |      |
|----------------------------------|--------------------|------|-------|------|-------|------|--------------------|------|-------|------|-------|------|-------|------|
| Methods                          | PBE0               | CCSD | PBE0  | CCSD | PBE0  | CCSD | PBE0               | CCSD | PBE0  | CCSD | PBE0  | CCSD | PBE0  | CCSD |
| ${}^{\text{FC}}J$                | 51.5               | 46.0 | 42.1  | 27.7 | 23.2  | 15.7 | 24.1               | 16.0 | 14.4  | 9.8  | 11.8  | 5.7  | 11.0  | 5.4  |
| ${}^{\text{SD}}J$                | -0.4               | -0.9 | -1.3  | -1.0 | -0.7  | -0.7 | -0.6               | -0.7 | -0.1  | -0.3 | 0.4   | 0.2  | 0.5   | 0.3  |
| ${}^{\text{PSO}}J$               | -7.7               | -3.6 | -4.3  | -3.0 | -4.3  | -3.0 | -4.5               | -3.5 | -4.5  | -3.1 | -4.3  | -3.1 | -3.6  | -2.7 |
| ${}^{\text{DSO}}J$               | 1.4                | 0.3  | 0.3   | -0.1 | -0.5  | -0.5 | -0.6               | -0.6 | -1.0  | -0.9 | -1.4  | -1.5 | -1.7  | -1.7 |
| total $J$ <sup>b</sup>           | 44.8               | 41.8 | 36.8  | 23.6 | 17.7  | 11.5 | 18.4               | 11.2 | 8.8   | 5.5  | 6.5   | 1.3  | 6.2   | 1.3  |
| $J_{\text{exp}}$                 | 19.63 <sup>c</sup> |      |       |      |       |      |                    |      |       |      |       |      |       |      |
| $r_{\text{F-H}_\text{F}}$        | 1.838              |      | 2.213 |      | 2.580 |      | 2.606              |      | 2.919 |      | 3.221 |      | 3.477 |      |
| $r_{\text{C-H}_\text{F}}$        | 1.089              |      | 1.091 |      | 1.091 |      | 1.078              |      | 1.090 |      | 1.090 |      | 1.091 |      |
| $r_{\text{C-F}}$                 | 1.426              |      | 1.386 |      | 1.368 |      | 1.346              |      | 1.359 |      | 1.358 |      | 1.365 |      |
| $\angle_{\text{F-C=C}}$          | 100                |      | 110   |      | 120   |      | 122                |      | 130   |      | 140   |      | 150   |      |
| $\angle_{\text{H}_\text{F-C=C}}$ | 100                |      | 110   |      | 120   |      | 121                |      | 130   |      | 140   |      | 150   |      |
| $\theta^{\text{d}}$              | 20                 |      | 40    |      | 60    |      | 63                 |      | 80    |      | 100   |      | 120   |      |

<sup>a</sup> in Hz. <sup>b</sup> total  $J = {}^{\text{FC}}J + {}^{\text{SD}}J + {}^{\text{PSO}}J + {}^{\text{DSO}}J$ . <sup>c</sup> V. S. Watts, J. H. Goldstein, *J. Chem. Phys.*, 1965, **42**, 228-233. <sup>d</sup> Angle between the  $\sigma_{\text{C}\alpha\text{-F}}$  and  $\sigma_{\text{C}\alpha'\text{-H}_\text{F}}$  vectors.

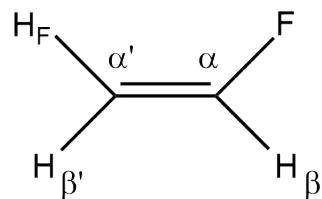

**Table S2.** NLMO contributions<sup>a</sup> for  ${}^3J_{\text{H}_F\text{F}}$  (in Hz) at PBE0/TZ2P varying the angle between the  $\sigma_{\text{C}\alpha\text{-F}}$  and  $\sigma_{\text{C}\alpha'\text{-H}_F}$  vectors of fluoro-ethylene from  $60^\circ$  to  $120^\circ$ .

| Parent NBO                                | 60        |            |              | 80        |            |              | 100       |            |              | 120       |            |              |
|-------------------------------------------|-----------|------------|--------------|-----------|------------|--------------|-----------|------------|--------------|-----------|------------|--------------|
|                                           | $J^{(L)}$ | $J^{(NL)}$ | $J^{(L+NL)}$ |
| CR (F)                                    | 3.23      | 0.01       | 3.24         | 2.93      | -0.01      | 2.92         | 3.00      | -0.02      | 2.98         | 3.08      | 0.03       | 3.11         |
| LP <sub>1</sub> (F)                       | -12.03    | 0.08       | -11.94       | -11.57    | -0.43      | -12.00       | -11.12    | -0.61      | -11.73       | -10.42    | -0.44      | -10.86       |
| LP <sub>2</sub> (F)                       | -2.92     | -0.08      | -3.01        | 0.60      | 0.13       | 0.73         | 4.18      | 0.38       | 4.56         | 6.80      | 0.66       | 7.46         |
| LP <sub>3</sub> (F)                       | 1.60      | -0.68      | 0.92         | 0.66      | -1.00      | -0.35        | -0.03     | -1.12      | -1.15        | -0.28     | -1.01      | -1.29        |
| $\sigma_{\text{C}\alpha\text{-C}\alpha'}$ | 0.41      | 0.01       | 0.42         | -0.06     | 0.05       | -0.01        | -0.48     | 0.07       | -0.41        | -0.72     | 0.09       | -0.63        |
| $\pi_{\text{C}\alpha\text{=C}\alpha'}$    | -4.52     | 0.23       | -4.29        | -4.39     | 0.40       | -3.99        | -3.82     | 0.53       | -3.29        | -3.33     | 0.70       | -2.63        |
| $\sigma_{\text{C}\alpha\text{-H}\beta}$   | 2.49      | 0.64       | 3.13         | 2.68      | 1.27       | 3.94         | 2.36      | 1.93       | 4.29         | 1.85      | 2.58       | 4.43         |
| $\sigma_{\text{C}\alpha'\text{-H}\beta'}$ | -0.21     | 3.05       | 2.84         | -0.73     | 3.18       | 2.45         | -0.88     | 2.77       | 1.89         | -0.65     | 1.98       | 1.33         |
| $\sigma_{\text{C}\alpha'\text{-H}_F}$     | 14.18     | 5.76       | 19.94        | 9.58      | 2.72       | 12.31        | 7.54      | 0.83       | 8.37         | 6.62      | -0.61      | 6.01         |
| $\sigma_{\text{C}\alpha\text{-F}}$        | 6.71      | -0.08      | 6.63         | 3.38      | 0.06       | 3.45         | 1.62      | 0.11       | 1.73         | 0.29      | 0.07       | 0.36         |
| Sum                                       | 9.05      | 9.02       | 18.07        | 3.42      | 6.45       | 9.87         | 2.89      | 4.96       | 7.85         | 3.86      | 4.12       | 7.98         |

<sup>a</sup> $J^{(L)}$  – Lewis,  $J^{(NL)}$  – Non-Lewis,  $J^{(L+NL)} = J^{(L)} + J^{(NL)}$ .





**Figure S7.** SSCC (Hz) in terms of NBO decomposition for fluoro-ethylene with 80° angle value between the  $\sigma_{C\alpha-F}$  and  $\sigma_{C\alpha'-H_F}$  vectors, in parentheses  $-E^{(2)}$  (kcal mol<sup>-1</sup>) delocalization associated with off-diagonal SSCC contribution.

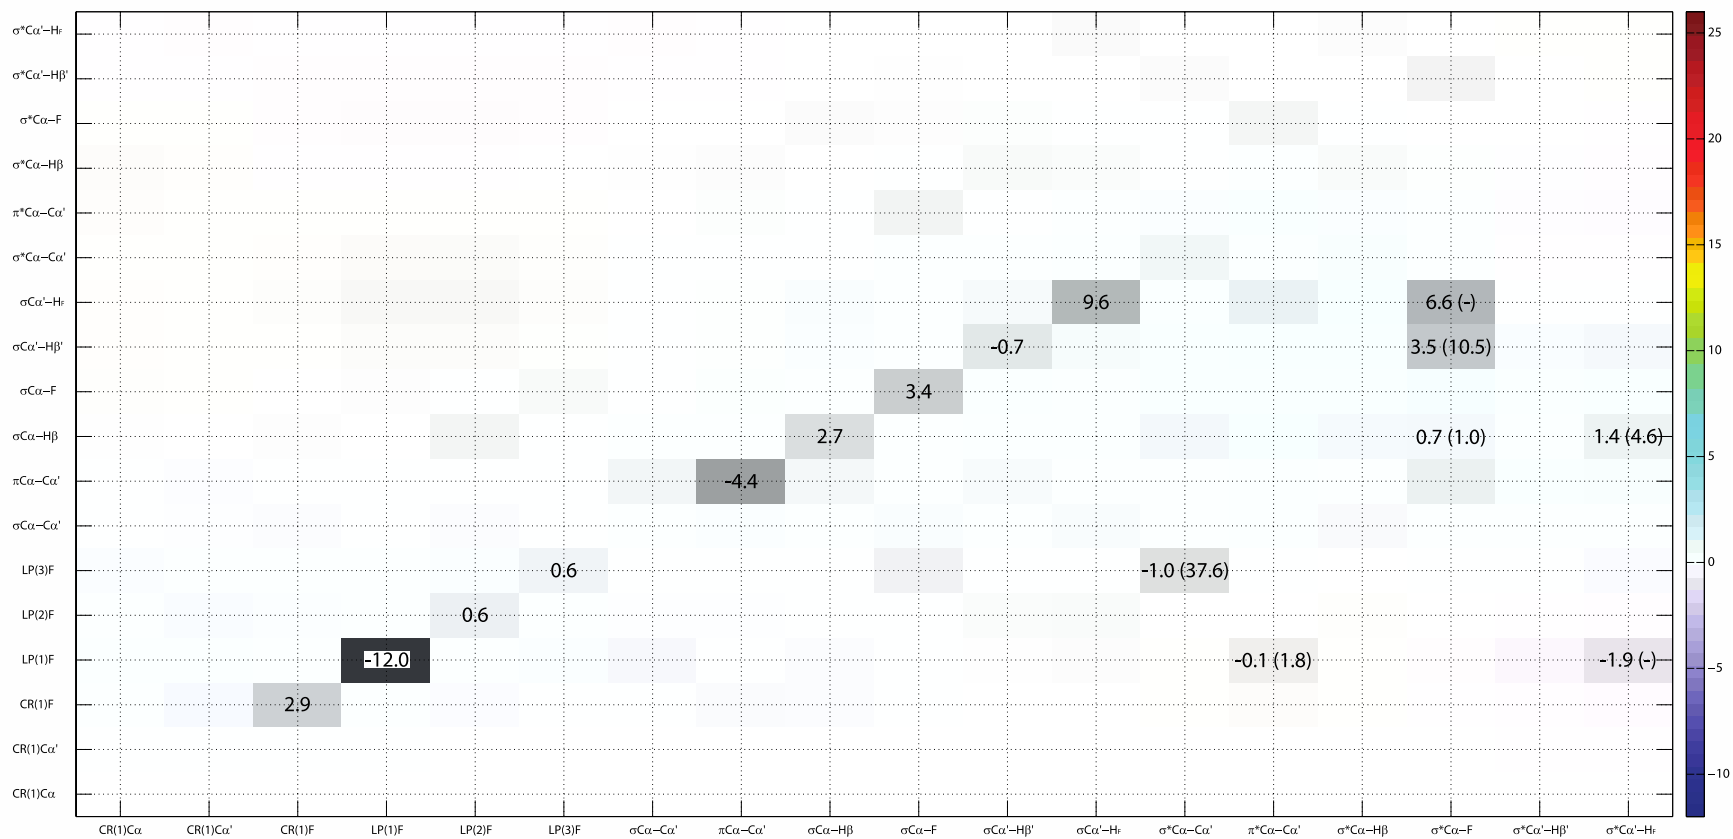

**Figure S8.** SSCC (Hz) in terms of NBO decomposition for fluoro-ethylene with 100° angle value between the  $\sigma_{C\alpha-F}$  and  $\sigma_{C\alpha'-H_F}$  vectors, in parentheses  $-E^{(2)}$  (kcal mol<sup>-1</sup>) delocalization associated with off-diagonal SSCC contribution.

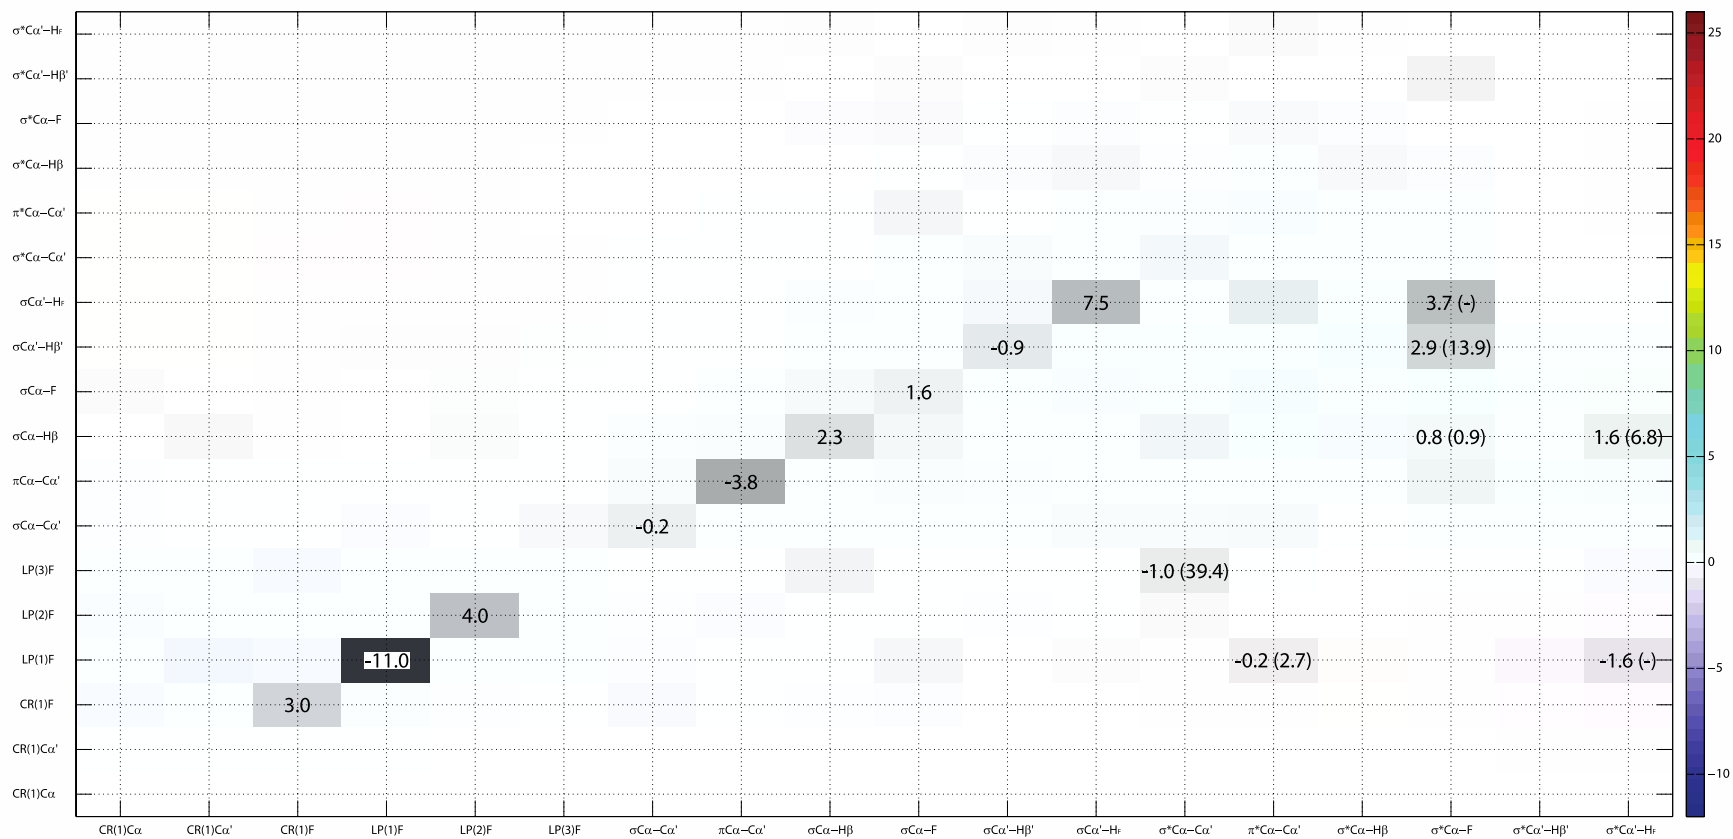

**Figure S9.** SSCC (Hz) in terms of NBO decomposition for fluoro-ethylene with 120° angle value between the  $\sigma_{C\alpha-F}$  and  $\sigma_{C\alpha'-H_F}$  vectors, in parentheses  $-E^{(2)}$  (kcal mol<sup>-1</sup>) delocalization associated with off-diagonal SSCC contribution.

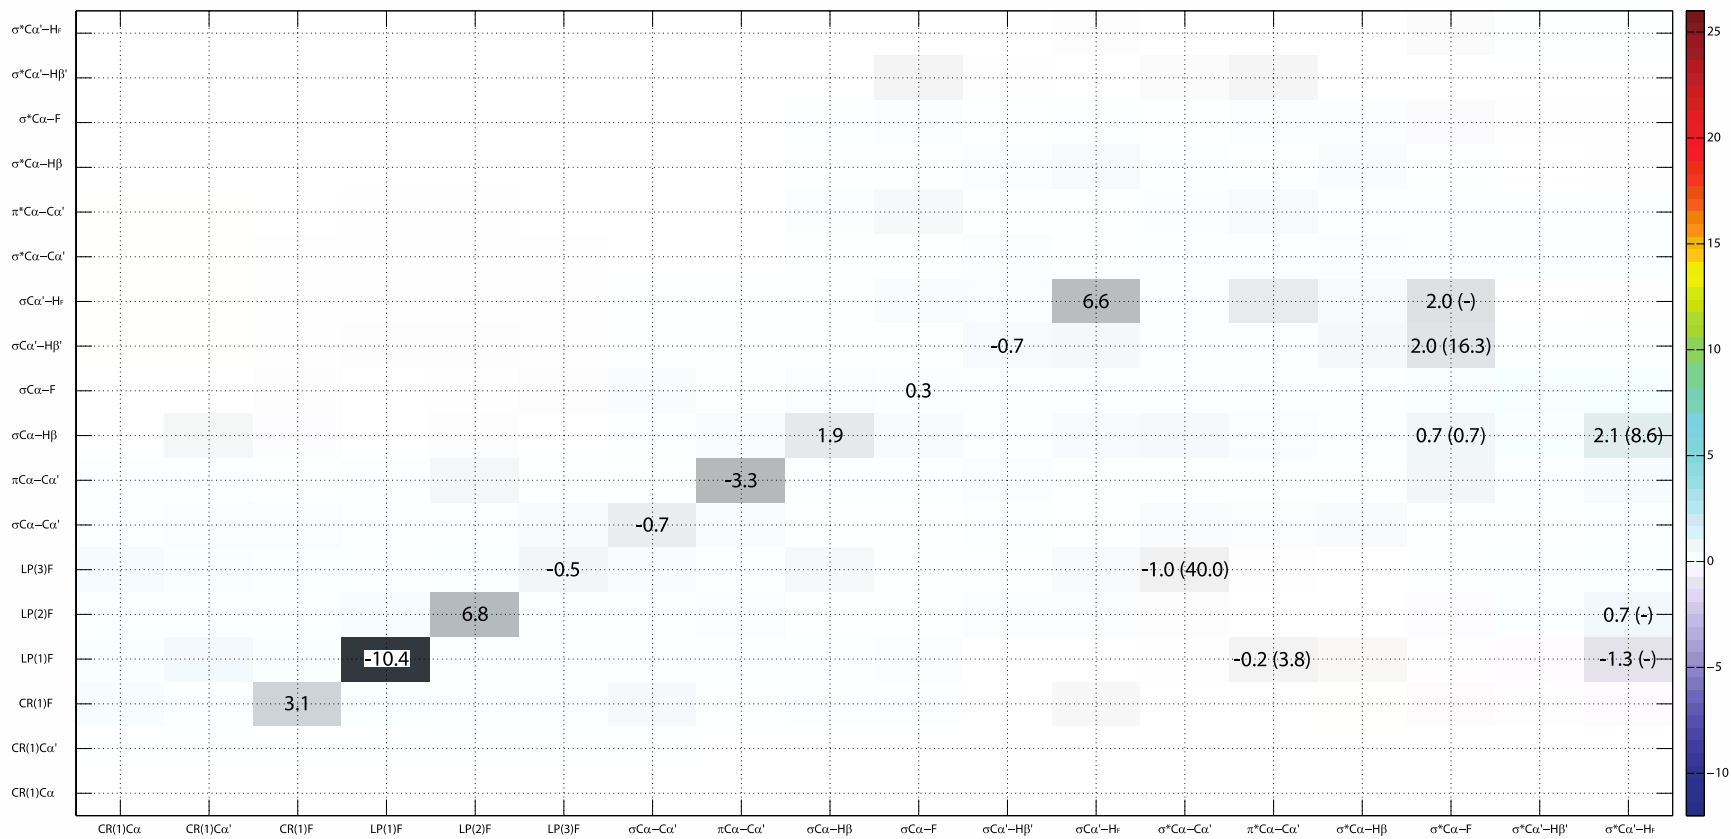

**Figure S10.** Main  ${}^3J_{\text{H}_\text{F}}^\text{TS}$  through-space ( ${}^\text{TS}J_{\text{H}_\text{F}}$ ) and through-bond ( ${}^\text{TB}J_{\text{H}_\text{F}}$ ) transmission mechanisms for fluoroethylene.

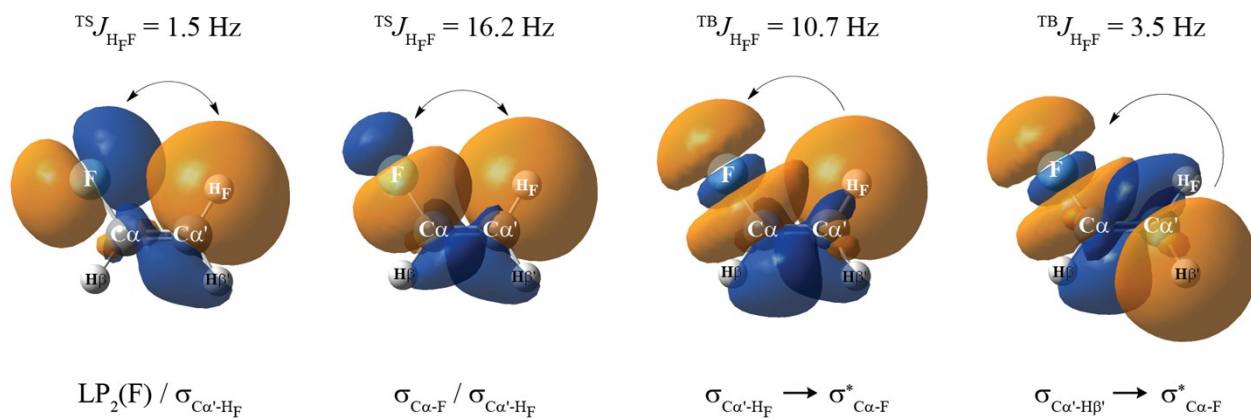

Supplement: c6cp04853f1.pdf [file c6cp04853f1.pdf]
